# Supplementary material
Source: HighWire-hosted journal article supplement (https://heart.bmj.com/content/105/3/244)
Supplement: inline-supplementary-material-1 [file inline-supplementary-material-1.docx]

**Appendix 1. Committees and Investigators**

**Executive Committee**

Nikolaos Dagres, Josep Brugada, Elena Arbelo, Luigi Tavazzi, Carina Blomström Lundqvist, Evgeny Pokushalov, Josef Kautzner, Aldo P. Maggioni.

**Steering Committee (National Coordinators)**

Clemens Steinwender, Alexandr Chasnoits, Georges Mairesse, Tosho Balabanski, Josef Kautzner, Sam Riahi, Mostafa Nawar, Mervat Abul El Maaty, Pekka Raatikainen, Frederic Anselme, Thorsten Lewalter, Turgut Brodherr, Michalis Efremidis, Laszlo Geller, Ben Glover, Roy Beinart, Michael Glikson, Fiorenzo Gaita, Roin Rekvava, Oskars Kalejs, Serge Trines, Zbigniew Kalarus, Mario Martins Oliveira, Pedro Adragao, Radu Ciudin, Evgeny Mikhaylov, Matjaz Sinkovec, Julian Perez Villacastin, Carina Blomström-Lundqvist, Oleg Sychov, Paul Roberts.

**Investigators**

**AUSTRIA** *Graz* D Daniel Scherr; Martin Manninger; Bernadette Mastnak; *Innsbruck* Otamr Pachinger; Florian Hintringer; Markus Stühlinger; *Linz* Clemens Steinwender; **BELGIUM** *Yvoir* Olivier Xhaet; **BULGARIA** *Sofia* Tchavdar Shalganov; Milko Stoyanov; Mihail Protich; *Sofia* Vassil Traykov; Daniel Marchov; Genadi Kaninski; **BELARUS** *Minsk* Alexandr Chasnoits; **CZECH REPUBLIC** *Prague* Robert Cihak; *Hradec* *Kralove* Ludek Haman; **GERMANY** *Frankfurt* Boris Schmidt; K.R. Julian Chun; Laura Perrotta; Stefano Bordignon; *Hamburg* Roland Tilz; *Hamburg* Stephan Willems; *Leipzig* Gerhard Hindricks; *München* Turgut Brodherr; Ilia S. Koutsouraki; Thorsten Lewalter; **DENMARK** *Aalborg* Sam Riahi; Bodil Ginnerup Sørensen; **EGYPT** *Cairo* Wagdi Galal; *Cairo* Amir AbdelWahab; *Cairo* S Sherif Mokhtar; **SPAIN** *Alicante* Ignacio Gil Ortega; Juan Gabriel Martinez Martinez; *Badajoz* Manuel Doblado Calatrava; *Barcelona* Roger Villuendas Sabate; *Barcelona* Lluis Mont Girbau; *Bilbao* Maria Fe Arcocha; Larraitz Gaztañaga; Estibaliz Zamarreño*; Granada* Miguel Álvarez; Rosa Macías; *Las Palmas de Gran Canaria* Federico Segura Villalobos; Juan Carlos Rodríguez Pérez; *Madrid* Nicasio Perez Castellano; Victoria Cañadas; Juan J Gonzalez Ferrer; David Filgueiras; *Madrid* Jose Manuel Rubio Campal; Pepa Sánchez-Borque; Juan Benezet-Mazuecos; *Madrid* Jorge Toquero Ramos; Fernandez Lozano; Victor Castro Urda; *Malaga* Alberto Barrera Cordero; Carmen Medina Palomo; Amalio Ruiz-Salas; Javier Alzueta; *Madrid* Rafael Peinado; David Filqueiras-Rama; Alfonso Gómez Gallanti; Daniel Garófalo; *Pamplona* Naiara Calvo; *Santander* Juan Jose Olalla Antolin; *Sevilla* Alonso Pedrote; Eduardo Arana-Rueda; Lorena García-Riesco; **FINLAND** *Turku* Juha Lund; *Tampere* Pekka Raatikainen; **FRANCE** *Grenoble* Pascal Defaye; Peggy Jacon; Sandrine Venier; Florian Dugenet; *Saint Denis* Olivier Piot; Xavier Copie; Olivier Paziaud; Antoine Lepillier; *Saint Etienne* Antoine Da Costa; Cécile Romeyer-Bouchard; *Toulouse* Serge Boveda; Jean-Paul Albenque; Nicolas Combes; Stéphane Combes*Marseille* Ange Ferracci; André Pisapia; **GREECE** *Athens* Demosthenes Katritsis; *Athens* Konstantinos Letsas; Kostas Vlachos; Louiza Lioni; *Thessaloniki* Vassilios P. Vassilikos; **HUNGARY** *Budapest* Laszlo Geller, Nándor Szegedi; Gábor Széplaki; Tamás Tahin; *Debrecen* Zoltan Csanadi; Gabor Sandorfi; Alexandra Kiss; Edina Nagy-Balo; *Szeged* Laszlo Saghy; **IRELAND** *Dublin* Benedict M. Glover; Joseph Galvin; Edward Keelan; **ISRAEL** *Ramat* Roy Beinart; Michael Glikson; Eyal Nof; **ITALY** *Acquaviva delle Fonti* Massimo Grimaldi; Federico Quadrini; Antonio Di Monaco; Federica Troisi; *Castellanza* Massimo Tritto; Elvira Renzullo; Antonio Sanzo; Domenico Zagari; *Cotignola* Carlo Pappone; *Crema* Pietro Maria Giovanni Agricola; *Milano* Paolo Della Bella; *Napoli* Giuseppe Stabile; Assunta Iuliano; *Pisa* Maria Grazia Bongiorni; *Roma* Leonardo Calo; Ermenegildo de Ruvo; Luigi Sciarra; *Torino* Matteo Anselmino; Fiorenzo Gaita; Federico Ferraris; *Varese* Roberto De Ponti; Raffaella Marazzi; Lorenzo A. Doni; **KAZAKHSTAN** *Almaty* Roin Rekvava; Anna Kim; **LATVIA** *Riga* Oskars Kalejs; **NETHERLANDS** *Breda* Sander Molhoek; *Groningen* Isabelle Van Gelder; Michiel Rienstra; *Leiden* Serge Trines; Marieke G. Compier; *Maastricht* Laurent Pison; Harry J. Crijns; Kevin Vernooy; Justin Luermans; *Rotterdam* Luc Jordaens; Natasja de Groot; Tamas Szili-Torok; Rohit Bhagwandien; *Zwolle* Arif Elvan; Thomas Buist; Pim Gal; **POLAND** *Lodz* Andrzej Lubinski; *Gdansk* Tomasz Krolak; *Katowice* Seweryn Nowak, Katarzyna Mizia-Stec; Anna Maria Wnuk-Wojnar; *Krakow* Jacek Lelakowski; *Szczecin* Jaroslaw Kazmierczak; *Warszawa* Piotr Kulakowski; Jakub Baran; *Warszawa* Grzegorz Opolski; Marek Kiliszek; Piotr Lodziński; Sonia Borodzicz; Paweł Balsam; *Poznan* Krzysztof Blaszyk; *Warszawa* Mariusz Pytkowski; Rafal Kuteszko; Jan Ciszewski; *Wroclaw* Artur Fuglewicz; *Zabrze* Zbigniew Kalarus; Aleksandra Woźniak; Karolina Adamczyk; **PORTUGAL** *Carnaxide Lisboa* Pedro Adragao; *Lisboa* Pedro Cunha; **ROMANIA** *Iasi* Mihaela Grecu; Grigore Tinica; *Cluj-Napoca* Lucian Muresan; Radu Rosu; **RUSSIAN FEDERATION** *Kemerovo* Egor Khomenko; *Khanty-Mansiysk* Nikita Scharikov; *Krasnoyarsk* Dmitry Zamanov; *Krasnoyarsk* Evgenii Kropotkin; *Novosibirsk* Evgeny Pokushalov; Alexander Romanov; Sevda Bayramova; *Saint-Petersburg* Evgeny N. Mikhaylov; Dmitry S. Lebedev; Anna V. Patsouk; *Saint-Petersburg* Sergey Yashin; *Saint-Petersburg* Dmitry Kryzhanovskiy; *Saransk* Vyacheslav Bazayev; *Surgut* Denis Morgunov; Ilya Silin; *Tomsk* Sergey Popov; *Tyumen* Vadim Kuznetsov; **SWEDEN** *Linköping* Anders Jönsson; *Lund* Pyotr Platonov; Fredrik Holmqvist; Ole Kongstad; Shiwen Yuan; *Umeå* Niklas Höglund; *Uppsala* Helena Malmborg; David Mörtsell; **SLOVENIA** *Ljubljana* Matjaz Sinkovec; Andrej Pernat; **UNITED KINGDOM** *Southampton* John Morgan;Paul Roberts; Elizabeth F. Greenwood; Lisa L. Fletcher; **UKRAINE** *Donetsk* Tetiana Kravchenko; *Kiev* Alexander Doronin; Maryna Meshkova; *Odessa* Iurii Karpenko; Alex Goryatchiy; Anna Abramova.
